# Supplementary material
Source: Springer Nature journal article supplement (https://www.springerprofessional.de/resource/supplementary/13638_2011_138_MOESM2_ESM.pdf/11897122)
Supplement: MOESM2 [file 11897122]

## The operation at reader side in $k$ -TAS

/\* Transmit queries and receives tag responses \*/

```
1  Initialize stack  $Q$ , temporary stack  $TQ$ , a predefined
2     parameter  $i$  and system values  $m, n$ 
3   $Q = NULL$ 
4   $TQ = NULL$ 
5   $n = \phi$ 
6
7  Transmit a Start command to start current session
8     and go to line 14
9  while  $Q \neq NULL$  do
10      $m = \text{Pop}(Q)$ 
11      $n = \text{Pop}(TQ)$ 
12      $n = n \parallel m$ 
13     Transmit a Query command with prefix value  $n$ 
14     Wait for tag responses  $RS_j = CRS_j \parallel PID_j$  and
15         detect the positions of collided bits among
16         received  $CRS_j$  bit strings
17     if (there are bit collisions occurred among
18         received  $CRS_j$  bit strings) then
19         for each collided bit position
20             retrieve  $CRS_j$ 
21             restore  $M_j$  and  $B_j$ 
22             Push ( $Q, B_j$ )
23             Push ( $TQ, n$ )
24     else if (there is no collision occurred among
25         received  $CRS_j$  bit strings) then
26         if (there are bit collisions occurred
27             among received  $PID_j$  bit strings) then
28             retrieve  $CRS_j$  and the first successive
29             bit strings  $o$  until the 1st collision
30             bit position among  $PID_j$  bit strings
31             restore  $M_j$  and  $B_j$ 
32             Push ( $Q, B_j \parallel o$ )
33             Push ( $TQ, n$ )
34         else if (there is no collision occurred
35             among received  $PID_j$  bit strings) then
36             Store the tag  $ID$ 
37         end if
38     end if
39 end while
40 Empty  $TQ$  /* release consumed memory*/
41 Transmit a Terminate command to cease current
42     session
```
